# Supplementary material for: Perfluoroalkyl bile esters: a new class of efficient gelators of organic and aqueous–organic media
Source: Royal Society of Chemistry journal article supplement (doi:10.1039/c1jm11912e), 2011-01-01
Supplement: c1jm11912e.pdf [file c1jm11912e.pdf]

## Supplementary Information

### Perfluoroalkyl bile esters: A new class of efficient gelators of organic and aqueous- organic media

Supratim Banerjee, V.M. Vidya, A.J. Savyasachi and Uday Maitra\*

#### Table of contents:

|                                                                                                   |     |
|---------------------------------------------------------------------------------------------------|-----|
| Table S1                                                                                          | S2  |
| Table S2                                                                                          | S2  |
| Table S3                                                                                          | S3  |
| Gelation tests                                                                                    | S3  |
| Gel-sol transition temperature                                                                    | S3  |
| Scanning electron microscopy                                                                      | S3  |
| Transmission electron microscopy                                                                  | S4  |
| Rheology                                                                                          | S4  |
| Synthesis and characterization of fluorinated bile acid derivatives<br>with spacer $-(CO)-OCH_2-$ | S4  |
| Synthesis and characterization of fluorinated bile acid derivatives<br>with spacer $-O-(CO)-$     | S12 |
| Synthesis of non-fluorinated bile acid ester derivatives with<br>spacer $-O-(CO)-$                | S20 |

**Table S1:** CGC and  $T_{\text{gel}}$  of  $\text{DC}_{24}\text{CH}_2\text{C}_2\text{F}_5$ ,  $\text{LC}_{24}\text{CH}_2\text{C}_2\text{F}_5$  and  $\text{C}_{24}\text{CH}_2\text{C}_9\text{F}_{19}$

| Compound                                          | Solvent                        | CGC (% w/v) | $T_{\text{gel}}$ (°C) |
|---------------------------------------------------|--------------------------------|-------------|-----------------------|
| $\text{DC}_{24}\text{CH}_2\text{C}_2\text{F}_5$   | 2:1 DMSO- $\text{H}_2\text{O}$ | 0.25        | 56                    |
|                                                   | 3:1 DMSO- $\text{H}_2\text{O}$ | 0.5         | 41                    |
| $\text{LC}_{24}\text{CH}_2\text{C}_2\text{F}_5$   | 2:1 DMF- $\text{H}_2\text{O}$  | 0.1         | 65                    |
|                                                   | 6:1 DMF- $\text{H}_2\text{O}$  | 0.9         | 42                    |
| $\text{C}_{24}\text{CH}_2\text{C}_9\text{F}_{19}$ | 2:1 DMF- $\text{H}_2\text{O}$  | 0.9         | 32                    |
|                                                   | 3:1 DMF- $\text{H}_2\text{O}$  | 0.15        | 64                    |

**Table S2:** Lack of gelation of the pentadecafluorooctyl esters (**1d-f**)

| Solvent                                        | $\text{C}_{24}\text{CH}_2\text{C}_7\text{F}_{15}$ | $\text{DC}_{24}\text{CH}_2\text{C}_7\text{F}_{15}$ | $\text{LC}_{24}\text{CH}_2\text{C}_7\text{F}_{15}$ |
|------------------------------------------------|---------------------------------------------------|----------------------------------------------------|----------------------------------------------------|
| <b>1. Toluene</b>                              | S (1.5)                                           | S (1.5)                                            | S (1.5)                                            |
| <b>2. 1-Propanol</b>                           | S (1.5)                                           | S (1.5)                                            | S (1.5)                                            |
| <b>3. DMSO</b>                                 | S (1.5)                                           | S (1.5)                                            | S (1.5)                                            |
| <b>4. DMF</b>                                  | S (1.5)                                           | S (1.5)                                            | S (1.5)                                            |
| <b>5. DMSO/<math>\text{H}_2\text{O}</math></b> |                                                   |                                                    |                                                    |
| 1:1                                            | N                                                 | P (0.75)                                           | P (1.5)                                            |
| 2:1                                            | VS (1.0)                                          | S (1.0)                                            | WG (1.0)                                           |
| 3:1                                            | N                                                 | N                                                  | WG (2.0)                                           |
| 4:1                                            | S (1.2)                                           | N                                                  | N                                                  |
| <b>5. DMF/<math>\text{H}_2\text{O}</math></b>  |                                                   |                                                    |                                                    |
| 1:1                                            | N                                                 | N                                                  | WG (2.0)                                           |
| 2:1                                            | GP(1.0)                                           | P (1.0)                                            | WG (1.0)                                           |
| 3:1                                            | N                                                 | N                                                  | PG (2.0)                                           |

S: solution; P: precipitate; WG: weak gel; VS: viscous solution; GP: gelatinous precipitate;  
 PG: partial gel; N: not checked (the numbers in the parentheses are the concentrations (in %  
 w/v) in which the observations were made).

**Table S3:** Lack of gelation of  $C_{23}C_9H_{19}$ ,  $DC_{23}C_9H_{19}$  and  $LC_{23}C_9H_{19}$  in different organic solvents

| Solvent      | $C_{23}C_9H_{19}$ | $DC_{23}C_9H_{19}$ | $LC_{23}C_9H_{19}$ |
|--------------|-------------------|--------------------|--------------------|
| 1. Toluene   | S                 | S                  | S                  |
| 2. DMSO      | S                 | TS                 | P                  |
| 3. DMF       | S                 | TS                 | S                  |
| 4. EtOH      | S                 | S                  | S                  |
| 5. n-Butanol | S                 | S                  | S                  |
| 6. n-Octanol | S                 | S                  | S                  |

S: solution; P: precipitate; TS: turbid solution (all the observations were made at 2.0 % w/v).

## Experimental section

### Gelation tests

Gelation tests were carried out by dissolving a known amount of the gelator in the respective solvent in a test tube (*d.* 8 mm, *l.* 10 cm) by heating followed by keeping the hot solution at room temperature. If the liquid did not flow upon inverting the test tube, it was termed as a gel.

### Gel-sol transition temperature

Gels were prepared in glass tubes (*d.* 8 mm, *l.* 10 cm) after sealing the open end and after stabilization for 12 h, the tubes were kept upside down in a thermostated paraffin oil bath. The temperature of the bath was increased in a controlled manner ( $\sim 2^\circ\text{C}/\text{min}$ ) and the temperature at which the gel fell under gravity was note as the  $T_{\text{gel}}$ .

### Imaging

#### Scanning Electron Microscopy

A drop of the hot sol ( $\sim 20\mu\text{L}$ ) was added on the carbon tape of a SEM sample stub. The sample was initially dried in air for 3-4 hours and followed by drying under high vacuum

for 5-6 hours. Before recording the images, the samples were gold coated using sputtering (50 Å) for 38 sec and examined using either QUANTA 200 or SIRION scanning electron microscopes.

### **Transmission Electron Microscopy**

A thin layer of a gel was made on a glass slide. Then a carbon coated copper grid was touched over the surface of the gel so as to make a very thin layer of the gel on the grid. The grid was subsequently dried first in air for 2-3 hours followed by drying under high vacuum for a further 4-5 hours. Then the grids were stained with an aqueous 0.1 % uranyl acetate solution, and dried again under high vacuum for 5-6 hours.

### **Rheology**

A serrated (only the rotor was serrated) plate-plate geometry (diameter 20 mm) was used in all the measurements. The temperature of the plate was controlled at 25 °C ( $\pm 0.1$  °C). The gels were loaded as hot sols (~0.5 mL) on the bottom plate and were allowed to form gels. After 5 min, the geometry (rotor) was brought down to a 500  $\mu\text{m}$  geometry gap in several steps and the excess sample was trimmed. The experimental gap of 400  $\mu\text{m}$  was then set and the gels were stabilized in the geometry gap for 2 h. The solvent evaporation was kept minimized by placing a metallic cover as a solvent trap.

### **Synthesis of fluorinated bile acid derivatives with the spacer $-(CO)-OCH_2-$**

#### **2,2,3,3,3,-Pentafluoro-1-propyl 4-toluenesulfonate (4):**

In a 10 mL round bottom flask equipped with a dry  $\text{CaCl}_2$  guard tube, 2.4 mL of dry pyridine was taken and 2,2,3,3,3-pentafluoropropanol (400  $\mu\text{L}$ , 4 mmol) was added. The solution was stirred at 0°C by keeping in an ice-bath and tosyl chloride (0.91 g, 4.8 mmol) was added to it in portions. The reaction mixture was stirred at room temperature for 48 h, and then poured into a mixture of 2.8 mL of conc HCl and 4.8 mL of  $\text{H}_2\text{O}$  and cooled in an ice-bath. A white compound started to precipitate out. The white solid was extracted with  $\text{Et}_2\text{O}$  (3 $\times$ 10 mL). The organic layers were combined, washed with water (2 $\times$ 10 mL), dried over anhyd.  $\text{Na}_2\text{SO}_4$ , filtered and rotavaped. Finally the product was dried under high vacuum. Yield 0.81 g (67 %).

**<sup>1</sup>H NMR (300 MHz, CDCl<sub>3</sub>) δ:** 7.81 (d, J = 8.4 Hz, 2H), 7.39 (d, J = 8.4 Hz, 2H), 4.41 (t, J = 12 Hz, 2H), 2.48 (s, 3H).

**IR (KBr, cm<sup>-1</sup>):** 3448, 3014, 2971, 1598, 1377, 1221, 1204, 1149, 1034.

**mp:** 51-52 °C.

**General procedure for the preparation of 2,2,3,3,4,4,5,5,6,6,7,7,8,8,8-pentadecafluoro-1-octyl 4-toluenesulfonate (5) and 2,2,3,3,4,4,5,5,6,6,7,7,8,8,9,9,10,10,10-nonadecafluoro-1-decyl 4-toluenesulfonate (6):**

In a typical procedure, tosyl chloride (3.75 mmol) was taken in a 10 mL round bottom flask (equipped with a dry CaCl<sub>2</sub> filled guard tube) and dry Et<sub>2</sub>O (4 mL) was added to it. This mixture was stirred in an ice-bath. After a few minutes the mixture became homogenous and pentadecafluoro-1-octanol or nonadecafluoro-1-decanol (3.75 mmol) was added. The reaction mixture turned heterogeneous. KOH (9 mmol) was added and it was stirred in an ice-salt bath (~ -4 °C) for 24 h. After that the reaction mixture was poured into ice-water (20 mL) and extracted with EtOAc (3 × 20 mL). The organic layers were combined, dried over anhyd. Na<sub>2</sub>SO<sub>4</sub> and the solvent was removed under reduced pressure. The crude product was purified by a silica gel column.

**2,2,3,3,4,4,5,5,6,6,7,7,8,8,8-Pentadecafluoro-1-octyl tosylate (5):**

Eluent used for the column chromatography was 5 % EtOAc/Petroleum ether.

From 1 g of pentadecafluoro-1-octanol, 1.18 g of **5** was obtained as a white solid (85 %).

**<sup>1</sup>H NMR (300 MHz, CDCl<sub>3</sub>) δ:** 7.82 (d, J = 8.4 Hz, 2H), 7.38 (d, J = 8.4 Hz, 2H), 4.46 (t, J = 12.9 Hz, 2H), 2.47 (s, 3H).

**IR (KBr, cm<sup>-1</sup>):** 3448, 3014, 2968, 1599, 1371, 1201 (C-F), 1174, 1154 (C-F), 1034.

**mp:** 54-55 °C.

**2,2,3,3,4,4,5,5,6,6,7,7,8,8,9,9,10,10,10-Nonadecafluoro-1-decyl tosylate (6):**

Eluent used for the column chromatography was 10 % EtOAc/Petroleum ether.

From 0.5 g of nonadecafluoro-1-decanol, 0.5 g of **6** was obtained (75 %).

**<sup>1</sup>H NMR (300 MHz, CDCl<sub>3</sub>) δ:** 7.82 (d, J = 8.4 Hz, 2H), 7.38 (d, J = 8.4 Hz, 2H), 4.46 (t, J = 12.9 Hz, 2H), 2.48 (s, 3H).

**IR (KBr, cm<sup>-1</sup>):** 3446, 2984, 1598, 1375, 1215 (C-F), 1197, 1149 (C-F), 1054.

**mp:** 80-81 °C.

**General procedure for the synthesis of fluorinated bile acid derivatives having spacer–(CO)-OCH<sub>2</sub>–**

In a 10 mL round bottom flask equipped with a CaCl<sub>2</sub> guard tube, a bile acid (1.96 mmol, 1.5 eqv) was taken and dry DMSO (4 mL) was added. The mixture was stirred at 70 °C for 5 min and DBU (1.96 mmol, 1.5 eqv) was added. Stirring was continued for a further 1 h and then **4**, **5** or **6** (1.3 mmol, 1 eqv) was added. The mixture was stirred at 110 °C for 12 h. The reaction mixture was cooled to room temperature and poured into 15 mL of water. A solid precipitated out which was extracted by CHCl<sub>3</sub> (3×15 mL). The organic layers were combined, washed with water (15 mL), dried over anhyd. Na<sub>2</sub>SO<sub>4</sub>, filtered and rotavaped. Finally the crude product was dried under high vacuum and purified on a silica gel cocolumn (2 cm×16 cm).

**2,2,3,3,3-Pentafluoro-1-propyl 3 $\alpha$ , 7 $\alpha$ , 12 $\alpha$ -trihydroxy-5 $\beta$ -cholan-24-oate (C<sub>24</sub>CH<sub>2</sub>C<sub>2</sub>F<sub>5</sub>-1a):**

Eluent used for the column chromatography was 90 % EtOAc/Petroleum ether.

From 0.4 g of **4**, 0.4 g of C<sub>24</sub>CH<sub>2</sub>C<sub>2</sub>F<sub>5</sub> was obtained as a white solid (57 %).

**<sup>1</sup>H NMR (400 MHz, CDCl<sub>3</sub>) δ:** 4.53 (t, J = 13.2 Hz, 2H), 3.98 (br s, 1H), 3.85 (br s, 1H), 3.49-3.43 (m, 1H), 2.47 (m, 1H), 2.37 (m, 1H), 2.21 (m, 2H), 1.89-1.37 (m, steroidal CH, CH<sub>2</sub>), 0.99 (d, J = 6.0 Hz, 3H), 0.89 (s, 3H), 0.69 (s, 3H).

**<sup>13</sup>C NMR (100 MHz, CDCl<sub>3</sub>) δ:** 172.56, 73.07, 71.81, 68.43, 58.93 (t, J =27.3 Hz), 46.9, 46.37, 41.55, 41.44, 39.42, 35.29, 35.1, 34.72, 34.63, 30.65, 30.21, 28.09, 27.4, 26.26, 23.16, 22.35, 17.14, 12.36.

**<sup>19</sup>F NMR (376 MHz, CDCl<sub>3</sub>) δ:** -84.77 (s), -124.39 (s).

**HRMS:** Calcd. for C<sub>27</sub>H<sub>41</sub>O<sub>5</sub>F<sub>5</sub>+Na: 563.2772; found 563.2768.

**IR (KBr, cm<sup>-1</sup>):** 3402, 2939, 2870, 1762, 1206 (C-F), 1150 (C-F).

**mp:** 55-58 °C.

**[α]<sub>D</sub><sup>23</sup>:** +21 (c 1.0, CHCl<sub>3</sub>).

**2,2,3,3,3-Pentafluoro-1-propyl 3α, 12α-dihydroxy-5β-cholan-24-oate (DC<sub>24</sub>CH<sub>2</sub>C<sub>2</sub>F<sub>5</sub>-1b):**

Eluent used for the column chromatography was 45 % EtOAc/Petroleum ether.

From 0.4 g of **4**, 0.31g of DC<sub>24</sub>CH<sub>2</sub>C<sub>2</sub>F<sub>5</sub> was obtained as a white solid (46 %).

**<sup>1</sup>H NMR (400 MHz, CDCl<sub>3</sub>) δ:** 4.54 (t, J = 13.2 Hz, 2H), 3.98 (br s, 1H), 3.65-3.58 (m, 1H), 2.51-2.43 (m, 1H), 2.38-2.32 (m, 1H), 1.84-1.01 (m, steroidal CH, CH<sub>2</sub>), 0.97 (d, J = 6.4 Hz, 3H), 0.91 (s, 3H), 0.68 (s, 3H).

**<sup>13</sup>C NMR (100 MHz, CDCl<sub>3</sub>) δ:** 172.51, 73.09, 71.71, 58.94 (t, J =27.4 Hz), 48.2, 47.15, 46.45, 42.01, 36.36, 35.98, 35.18, 34.99, 34.07, 33.59, 30.65, 30.56, 30.39, 28.66, 27.37, 27.08, 26.08, 23.6, 23.09, 17.12, 12.65.

**<sup>19</sup>F NMR (376 MHz, CDCl<sub>3</sub>) δ:** -84.77 (s), -124.39 (s).

**HRMS:** Calcd. for C<sub>27</sub>H<sub>41</sub>O<sub>4</sub>F<sub>5</sub>+Na: 547.2823; found 547.2791.

**IR (KBr, cm<sup>-1</sup>):** 3394, 2938, 2867, 1762, 1206 (C-F), 1150 (C-F).

**mp:** 61-62°C.

**[α]<sub>D</sub><sup>23</sup>:** +33 (c 1.0, CHCl<sub>3</sub>).

**2,2,3,3,3-Pentafluoro-1-propyl 3 $\alpha$ -hydroxy-5 $\beta$ -cholan-24-oate (LC<sub>24</sub>CH<sub>2</sub>C<sub>2</sub>F<sub>5</sub>-1c):**

Eluent used for the column chromatography was 20 % EtOAc/Petroleum ether.

From 0.4 g of **4**, 0.32 g of LC<sub>24</sub>CH<sub>2</sub>C<sub>2</sub>F<sub>5</sub> was obtained as a white solid (49 %).

**<sup>1</sup>H NMR (400 MHz, CDCl<sub>3</sub>)  $\delta$ :** 4.53 (t, J = 12.8 Hz, 2H), 3.67-3.59 (m, 1H), 2.44-2.42 (m, 1H), 2.37-2.32 (m, 1H), 2.17-1.07 (m, steroidal CH, CH<sub>2</sub>), 0.92 (d and s merged, 6H), 0.65 (s, 3H).

**<sup>13</sup>C NMR (100 MHz, CDCl<sub>3</sub>)  $\delta$ :** 172.57, 71.82, 59.94 (t, J = 27.5 Hz), 56.44, 55.83, 42.71, 42.04, 40.38, 40.12, 36.40, 35.80, 35.31, 35.20, 34.53, 30.66, 30.60, 30.49, 28.08, 27.15, 26.37, 24.15, 23.33, 20.77, 18.12, 11.97.

**<sup>19</sup>F NMR (376 MHz, CDCl<sub>3</sub>)  $\delta$ :** -84.77 (s), -124.39 (s).

**HRMS:** Calcd. for C<sub>27</sub>H<sub>41</sub>O<sub>3</sub>F<sub>5</sub>+Na: 531.2874; found 531.2880.

**IR (KBr, cm<sup>-1</sup>):** 3312, 2937, 2864, 1764, 1206 (C-F), 1151 (C-F), 1107.

**mp:** 80-82°C.

**$[\alpha]_D^{23}$ :** +19 (c 1.0, CHCl<sub>3</sub>).

**2,2,3,3,4,4,5,5,6,6,7,7,8,8,8-Pentadecafluoro-1-octyl 3 $\alpha$ , 7 $\alpha$ , 12 $\alpha$ -trihydroxy-5 $\beta$ -cholan-24-oate (C<sub>24</sub>CH<sub>2</sub>C<sub>7</sub>F<sub>15</sub>-1d):**

Eluent used for the column chromatography was 95 % EtOAc/Petroleum ether.

From 0.2 g of **5**, 0.14 g of C<sub>24</sub>CH<sub>2</sub>C<sub>7</sub>F<sub>15</sub> was obtained as a white solid (50 %).

**<sup>1</sup>H NMR (400 MHz, CDCl<sub>3</sub>)  $\delta$ :** 4.59 (t, J = 13.6 Hz, 2H), 3.98 (br s, 1H), 3.85 (br s, 1H), 3.49-3.42 (m, 1H), 2.53-2.36 (m, 2H), 2.25-2.17 (m, 2H), 1.97-1.07 (m, steroidal CH, CH<sub>2</sub>), 0.99 (d, J = 6.0 Hz, 3H), 0.89 (s, 3H), 0.68 (s, 3H).

**<sup>13</sup>C NMR (100 MHz, CDCl<sub>3</sub>)  $\delta$ :** 172.63, 73.08, 71.81, 68.45, 59.26 (t, J = 26 Hz), 46.89, 46.36, 41.55, 41.41, 39.41, 35.29, 35.10, 34.71, 34.61, 30.63, 30.17, 28.06, 27.41, 26.26, 23.16, 22.33, 17.12, 12.33.



**<sup>19</sup>F NMR (376 MHz, CDCl<sub>3</sub>) δ:** -81.67 (t, J = 11.2 Hz), -120.38 (s), -122.87 (br s), -123.63 (br s), -124.2 (br s), -127.00 (br s).

**HRMS:** Calcd. for C<sub>32</sub>H<sub>41</sub>O<sub>5</sub>F<sub>15</sub>+Na: 813.2612; found 813.2606.

**IR (KBr, cm<sup>-1</sup>):** 3434, 2939, 2870, 1762, 1242, 1211 (C-F), 1149 (C-F).

**mp:** 125-127°C.

**[α]<sub>D</sub><sup>23</sup>:** +8 (c 1.0, CHCl<sub>3</sub>).

**2,2,3,3,4,4,5,5,6,6,7,7,8,8,8-Pentadecafluoro-1-octyl 3α, 12α-dihydroxy-5β-cholan-24-oate (DC<sub>24</sub>CH<sub>2</sub>C<sub>7</sub>F<sub>15</sub>-1e):**

Eluent used for the column chromatography was 50 % EtOAc/Petroleum ether.

From 0.4 g of **5**, 0.13 g of DC<sub>24</sub>CH<sub>2</sub>C<sub>7</sub>F<sub>15</sub> was obtained as a white solid (48 %).

**<sup>1</sup>H NMR (300 MHz, CDCl<sub>3</sub>) δ:** 4.59 (t, J = 13.5 Hz, 2H), 3.98 (br s, 1H), 3.66-3.56 (m, 1H), 2.53-2.32 (m, 2H), 2.17-1.07 (m, steroidal CH, CH<sub>2</sub>), 0.98 (d, J = 5.7 Hz, 3H), 0.91 (s, 3H), 0.68 (s, 3H).

**<sup>13</sup>C NMR (100 MHz, CDCl<sub>3</sub>) δ:** 172.54, 73.11, 71.75, 59.3 (t, J = 28 Hz), 48.23, 47.19, 46.46, 42.03, 36.39, 35.99, 35.18, 34.99, 34.08, 33.62, 30.67, 30.59, 30.43, 28.69, 27.36, 27.08, 26.08, 23.59, 23.09, 17.12, 12.63.

**<sup>19</sup>F NMR (376 MHz, CDCl<sub>3</sub>) δ:** -81.69 (t, J = 11.2 Hz), -120.38 (br s), -122.89 (br s), -123.62 (br s), -124.22 (br s), -127.00 (br s).

**HRMS:** Calcd. for C<sub>32</sub>H<sub>41</sub>O<sub>3</sub>F<sub>15</sub>+Na: 797.2663; found 797.2666.

**IR (KBr, cm<sup>-1</sup>):** 3403, 2938, 2867, 1763, 1243, 1212 (C-F), 1149 (C-F).

**mp:** 68-69°C.

**[α]<sub>D</sub><sup>23</sup>:** +23 (c 1.0, CHCl<sub>3</sub>).

**2,2,3,3,4,4,5,5,6,6,7,7,8,8,8-Pentadecafluoro-1-octyl 3 $\alpha$ -hydroxy-5 $\beta$ -cholan-24-oate (LC<sub>24</sub>CH<sub>2</sub>C<sub>7</sub>F<sub>15</sub>-1f):**

Eluent used for the column chromatography was 15 % EtOAc/Petroleum ether.

From 0.4 g of **5**, 0.22 g of LC<sub>24</sub>CH<sub>2</sub>C<sub>7</sub>F<sub>15</sub> was obtained as a white solid (41 %).

**<sup>1</sup>H NMR (300 MHz, CDCl<sub>3</sub>)  $\delta$ :** 4.58 (t, J = 13.5 Hz, 2H), 3.63 (m, 1H), 2.46-2.31 (m, 2H), 2.17-1.07 (m, steroidal CH, CH<sub>2</sub>), 0.92 (d and s merged, 6H), 0.65 (s, 3H).

**<sup>13</sup>C NMR (100 MHz, CDCl<sub>3</sub>)  $\delta$ :** 172.62, 71.84, 59.3 (t, J = 27 Hz), 56.45, 55.85, 42.72, 42.06, 40.39, 40.13, 36.42, 35.82, 35.31, 35.21, 34.54, 30.68, 30.63, 30.51, 28.09, 27.16, 26.38, 24.15, 23.33, 20.79, 18.11, 11.96.

**<sup>19</sup>F NMR (376 MHz, CDCl<sub>3</sub>)  $\delta$ :** -81.69 (t, J = 11.2 Hz), -120.38 (s), -122.89 (br s), -123.62 (br s), -124.2 (br s), -126.99 (br s).

**HRMS:** Calcd. for C<sub>32</sub>H<sub>41</sub>O<sub>3</sub>F<sub>15</sub>+Na: 781.2714; found 781.2708.

**IR (KBr, cm<sup>-1</sup>):** 3329, 2928, 1763, 1243, 1212 (C-F), 1149 (C-F).

**mp:** 64-66°C.

**$[\alpha]_D^{23}$ :** +20 (c 1.0, CHCl<sub>3</sub>).

**2,2,3,3,4,4,5,5,6,6,7,7,8,8,9,9,10,10,10-Nonadecafluoro-1-decyl 3 $\alpha$ , 7 $\alpha$ , 12 $\alpha$ -trihydroxy-5 $\beta$ -cholan-24-oate (C<sub>24</sub>CH<sub>2</sub>C<sub>9</sub>F<sub>19</sub>-1g):**

Eluent used for the column chromatography was EtOAc.

From 0.3 g of **6**, 0.17 g of C<sub>24</sub>CH<sub>2</sub>C<sub>9</sub>F<sub>19</sub> was obtained as a white solid (42 %).

**<sup>1</sup>H NMR (300 MHz, CDCl<sub>3</sub>)  $\delta$ :** 4.59 (t, J = 13.6 Hz, 2H), 3.98 (br s, 1H), 3.85 (br s, 1H), 3.46 (m, 1H), 2.53-2.36 (m, 2H), 2.25-2.17 (m, 2H), 1.94-1.07 (m, steroidal CH, CH<sub>2</sub>), 0.99 (d, J = 6.0 Hz, 3H), 0.89 (s, 3H), 0.69 (s, 3H).

**<sup>13</sup>C NMR (100 MHz, CDCl<sub>3</sub>) δ:** 172.62, 73.08, 71.86, 68.45, 59.26 (t, J = 26 Hz), 46.92, 46.40, 41.6, 41.45, 39.46, 35.28, 35.11, 34.73, 34.65, 30.63, 30.3, 28.13, 27.41, 26.3, 23.17, 22.34, 17.14, 12.33.

**<sup>19</sup>F NMR (376 MHz, CDCl<sub>3</sub>) δ:** -81.67 (t, J = 11.2 Hz), -120.38 (t, J = 13 Hz), -122.75 (br s), -123.58 (br s), -124.2 (br s), -127.00 (br s).

**HRMS:** Calcd. for C<sub>34</sub>H<sub>41</sub>O<sub>5</sub>F<sub>19</sub>+Na: 913.2548; found 913.2542.

**IR (KBr, cm<sup>-1</sup>):** 3428, 2939, 2871, 1762, 1242, 1214 (C-F), 1152 (C-F).

**mp:** 136-138°C.

**[α]<sub>D</sub><sup>23</sup>:** +11 (c 1.0, CHCl<sub>3</sub>).

**2,2,3,3,4,4,5,5,6,6,7,7,8,8,9,9,10,10-Nonadecafluoro-1-decyl 3α, 12α-dihydroxy-5β-cholan-24-oate (DC<sub>24</sub>CH<sub>2</sub>C<sub>9</sub>F<sub>19</sub>-1h):**

Eluent used for the column chromatography was 40 % EtOAc/Petroleum ether.

From 0.4 g of **6**, 0.23 g of DC<sub>24</sub>CH<sub>2</sub>C<sub>9</sub>F<sub>19</sub> was obtained as a white solid (43 %).

**<sup>1</sup>H NMR (300 MHz, CDCl<sub>3</sub>) δ:** 4.59 (t, J = 13.5 Hz, 2H), 3.98 (br s, 1H), 3.65 (m, 1H), 2.53-2.32 (m, 2H), 2.17-1.07 (m, steroidal CH, CH<sub>2</sub>), 0.98 (d, J = 5.1 Hz, 3H), 0.68 (s, 3H).

**<sup>13</sup>C NMR (100 MHz, CDCl<sub>3</sub>) δ:** 172.55, 73.12, 71.75, 59.3 (t, J = 27 Hz), 48.22, 47.19, 46.46, 42.03, 36.37, 35.99, 35.17, 34.98, 34.08, 33.61, 30.66, 30.58, 30.41, 28.67, 27.36, 27.07, 26.08, 23.59, 23.08, 17.12, 12.63.

**<sup>19</sup>F NMR (376 MHz, CDCl<sub>3</sub>) δ:** -81.70 (t, J = 11.3 Hz), -120.39 (t, J = 11.3 Hz), -122.76 (br s), -123.59 (br s), -124.2 (br s), -127.01 (br s).

**HRMS:** Calcd. for C<sub>34</sub>H<sub>41</sub>O<sub>4</sub>F<sub>19</sub>+Na: 897.2599; found 897.2589.

**IR (KBr, cm<sup>-1</sup>):** 3417, 2926, 2861, 1763, 1242, 1214 (C-F), 1152 (C-F).

**mp:** 79-80°C.

**[α]<sub>D</sub><sup>23</sup>:** +13 (c 1.0, CHCl<sub>3</sub>).

**2,2,3,3,4,4,5,5,6,6,7,7,8,8,9,9,10,10,10-Nonadecafluoro-1-decyl 3 $\alpha$ -hydroxy-5 $\beta$ -cholan-24-oate (LC<sub>24</sub>CH<sub>2</sub>C<sub>9</sub>F<sub>19</sub>-1i):**

Eluent used for the column chromatography was 15 % EtOAc/Petroleum ether.

From 0.4 g of **6**, 0.12 g of LC<sub>24</sub>CH<sub>2</sub>C<sub>9</sub>F<sub>19</sub> was obtained as a white solid (45%).

**<sup>1</sup>H NMR (300 MHz, CDCl<sub>3</sub>)  $\delta$ :** 4.58 (t, J = 13.5 Hz, 2H), 3.63 (m, 1H), 2.46-2.31 (m, 2H), 2.17-1.07 (m, steroidal CH, CH<sub>2</sub>), 0.92 (d and s merged, 6H), 0.65 (s, 3H).

**<sup>13</sup>C NMR (100 MHz, CDCl<sub>3</sub>)  $\delta$ :** 172.59, 71.85, 59.3 (t, J = 27 Hz), 56.47, 55.89, 42.74, 42.09, 40.43, 40.16, 36.45, 35.84, 35.33, 35.21, 34.56, 30.70, 30.64, 30.54, 28.09, 27.17, 26.39, 24.15, 23.32, 20.80, 18.11, 11.95.

**<sup>19</sup>F NMR (376 MHz, CDCl<sub>3</sub>)  $\delta$ :** -81.72 (t, J = 11.2 Hz), -120.36 (t, J = 11.3 Hz), -122.74 (br s), -123.57 (br s), -124.2 (br s), -127.98 (br s).

**HRMS:** Calcd. for C<sub>34</sub>H<sub>41</sub>O<sub>3</sub>F<sub>19</sub>+Na: 881.2650; found 881.2649.

**IR (KBr, cm<sup>-1</sup>):** 3375, 2936, 2865, 1761, 1241, 1212 (C-F), 1151 (C-F).

**mp:** 75-77°C.

**$[\alpha]_D^{23}$ :** +8 (c 1.0, CHCl<sub>3</sub>).

**Synthesis of fluorinated bile acid derivatives with spacer –O-(CO)-**

**General procedure**

In a 10 mL round bottom flask equipped with a CaCl<sub>2</sub> guard tube, a perfluoroacid (0.52 mmol, 1.3 eqv) was taken and dry DMF (2 mL) was added to it. The mixture was stirred at 70 °C to make a homogenous solution. Then DBU (0.52 mmol, 1.3 eqv) was added to it as a solution in dry DMF (prepared by adding 1 volume of DBU to 4 volume of dry DMF) and the stirring was continued for 1 hr at 70 °C. The reaction mixture slowly turned yellowish during this period. Then **7**, **8** or **9** (0.4 mmol, 1 eqv) was added and stirred at this temperature for 12 hr. After that the reaction mixture was cooled to room temperature and poured into 15 mL of water. A solid precipitated out which was extracted by either EtOAc (3×15 mL) for the derivatives of perfluorotetradecanoic and perfluorododecanoic acids or by CHCl<sub>3</sub> (3×15 mL) for the other shorter chain perfluoro acids. The organic layers were

combined, washed with water (15 mL), dried over anhyd. Na<sub>2</sub>SO<sub>4</sub>, filtered and rotavaped. Finally the crude product was dried under high vacuum and purified by a silica gel column (2 cm×16 cm).

**3 $\alpha$ , 12 $\alpha$ -Dihydroxy-24-nor-5 $\beta$ -cholan-23-yl perfluorooctan-1-oate (DC<sub>23</sub>C<sub>7</sub>F<sub>15</sub>-2a):**

Eluent used for the column chromatography was 55% EtOAc/Petroleum ether.

From 300 mg of **8**, 216 mg of DC<sub>23</sub>C<sub>7</sub>F<sub>15</sub> was obtained as a white solid (45 %).

**<sup>1</sup>H NMR (400 MHz, CDCl<sub>3</sub>)  $\delta$ :** 4.46-4.39 (m, 2H), 3.98 (br s, 1H), 3.65-3.59 (m, 1H), 1.89-1.06 (m), 1.02 (d, J = 6.4 Hz, 3H), 0.92 (s, 3H), 0.65 (s, 3H).

**<sup>13</sup>C NMR (100 MHz, CDCl<sub>3</sub>)  $\delta$ :** 158.34 (t, J = 26 Hz), 73.04, 71.73, 66.98, 48.24, 47.31, 46.50, 42.04, 42.03, 36.39, 35.99, 35.17, 34.09, 34.01, 33.62, 32.68, 30.43, 28.78, 27.50, 27.08, 26.08, 23.56, 23.09, 17.43, 12.43.

**<sup>19</sup>F NMR (376 MHz, CDCl<sub>3</sub>)  $\delta$ :** -80.72 (t, J = 9.4 Hz), -118.39 (t, J = 11.3 Hz), -121.61 (br s), -121.96 (br s), -122.59 (br s), -126.02 (br s).

**HRMS:** Calcd. for C<sub>31</sub>H<sub>39</sub>O<sub>4</sub>F<sub>15</sub>+Na: 783.2507; found 783.2502.

**IR (KBr, cm<sup>-1</sup>):** 3362, 2939, 2867, 1782, 1217 (C-F), 1151 (C-F).

**mp:** 44-45 °C.

**$[\alpha]_D^{23}$ :** +45 (c 1.0, CHCl<sub>3</sub>).

**3 $\alpha$ -Hydroxy-24-nor-5 $\beta$ -cholan-23-yl perfluorooctan-1-oate (LC<sub>23</sub>C<sub>7</sub>F<sub>15</sub>-2b):**

Eluent used for the column chromatography was 20% EtOAc/Petroleum ether.

From 0.3 g of **9**, 0.2 g of LC<sub>23</sub>C<sub>7</sub>F<sub>15</sub> was obtained as a white solid (43 %).

**<sup>1</sup>H NMR (400 MHz, CDCl<sub>3</sub>)  $\delta$ :** 4.46-4.38 (m, 2H), 3.66-3.60 (m, 1H), 1.98-1.01 (m), 0.97 (d, J = 6.4 Hz, 3H), 0.92 (s, 3H), 0.65 (s, 3H).

**<sup>13</sup>C NMR (100 MHz, CDCl<sub>3</sub>) δ:** 158.31 (t, J =27 Hz), 71.88, 67.03, 56.45, 56.06, 42.78, 42.05, 40.40, 40.11, 36.37, 35.80, 35.30, 34.54, 34.05, 32.87, 30.47, 28.19, 27.14, 26.37, 24.11, 23.31, 20.77, 18.47, 11.79.

**<sup>19</sup>F NMR (376 MHz, CDCl<sub>3</sub>) δ:** -80.73 (t, J = 9.4 Hz), -118.40 (t, J= 11.3 Hz), -121.61 (br s), -121.96 (br s), -122.60 (br s), -126.02 (br s).

**HRMS:** Calcd. for C<sub>31</sub>H<sub>39</sub>O<sub>3</sub>F<sub>15</sub>+Na: 767.2551; found 767.2558.

**IR (KBr, cm<sup>-1</sup>):** 3459, 2934, 2866, 1780, 1214 (C-F), 1153 (C-F).

**mp:** 62-63 °C.

**[α]<sub>D</sub><sup>23</sup>:** +20 (c 1.0, CHCl<sub>3</sub>).

**3α, 7α, 12α-Trihydroxy-24-nor-5β-cholan-23-yl perfluorodecan-1-oate (C<sub>23</sub>C<sub>9</sub>F<sub>19</sub>-2c):**

Eluent used for the column chromatography was EtOAc.

From 0.2 g of **8**, 0.14 g of C<sub>23</sub>C<sub>9</sub>F<sub>19</sub> was obtained as a white solid (39 %).

**<sup>1</sup>H NMR (400 MHz, CDCl<sub>3</sub>) δ:** 4.46-4.38 (m, 2H), 3.98 (br s, 1H), 3.86 (br s, 1H), 3.47-3.44 (m, 1H), 2.2 (m, 2H), (1.98-1.07 (m), 1.04 (d, J = 6.4 Hz, 3H), 0.89 (s, 3H), 0.69 (s, 3H).

**<sup>13</sup>C NMR (100 MHz, CDCl<sub>3</sub>) δ:** 158.35 (t, J =27 Hz), 73.04, 71.8, 68.42, 67.0, 47.02, 46.39, 41.56, 41.41, 39.39, 35.28, 34.71, 34.62, 34.05, 32.75, 30.16, 29.69, 28.09, 27.52, 26.25, 23.11, 22.29, 17.43, 12.12.

**<sup>19</sup>F NMR (376 MHz, CDCl<sub>3</sub>) δ:** -80.71 (t, J = 9.4 Hz), -118.37 (t, J = 11.3 Hz), -121.7 (br s), -122.57 (br s), -126.03 (br s).

**HRMS:** Calcd. for C<sub>33</sub>H<sub>39</sub>O<sub>5</sub>F<sub>19</sub>+Na: 899.2392; found 899.2391.

**IR (KBr, cm<sup>-1</sup>):** 3426, 2940, 2858, 1781, 1210 (C-F), 1152 (C-F).

**mp:** 70-71 °C.

**[α]<sub>D</sub><sup>23</sup>:** +16 (c 1.0, CHCl<sub>3</sub>).

**3 $\alpha$ , 12 $\alpha$ -Dihydroxy-24-nor-5 $\beta$ -cholan-23-yl perfluorodecan-1-oate (DC<sub>23</sub>C<sub>9</sub>F<sub>19</sub>-2d):**

Eluent used for the column chromatography was 60% EtOAc/Petroleum ether.

From 0.15 g of **8**, 0.14 g of DC<sub>23</sub>C<sub>9</sub>F<sub>19</sub> was obtained as a white solid (51 %).

**<sup>1</sup>H NMR (300 MHz, CDCl<sub>3</sub>)  $\delta$ :** 4.46-4.39 (m, 2H), 3.98 (br s, 1H), 3.67-3.57 (m, 1H), 1.98-1.07 (m), 1.03 (d, J = 6.0 Hz, 3H), 0.92 (s, 3H), 0.68 (s, 3H).

**<sup>13</sup>C NMR (100 MHz, CDCl<sub>3</sub>)  $\delta$ :** 158.35 (t, J = 27 Hz), 73.04, 71.76, 66.98, 48.25, 47.34, 46.50, 42.03, 36.39, 36.0, 35.16, 34.09, 34.01, 33.64, 32.65, 30.44, 28.79, 27.48, 27.07, 26.08, 23.55, 23.09, 17.45, 12.45.

**<sup>19</sup>F NMR (376 MHz, CDCl<sub>3</sub>)  $\delta$ :** -81.67 (t, J = 11.2 Hz), -119.32 (t, J = 11.2 Hz), -122.74 (br s), -123.57 (br s), -124.2 (br s), -127.98 (br s).

**HRMS:** Calcd. for C<sub>33</sub>H<sub>39</sub>O<sub>4</sub>F<sub>19</sub>+Na: 883.2443; found 883.2446.

**IR (KBr, cm<sup>-1</sup>):** 3401, 2939, 2867, 1783, 1243, 1210 (C-F), 1148 (C-F).

**mp:** 46-48°C.

**$[\alpha]_D^{23}$ :** +35 (c 1.0, CHCl<sub>3</sub>).

**3 $\alpha$ -Hydroxy-24-nor-5 $\beta$ -cholan-23-yl perfluorodecan-1-oate (LC<sub>23</sub>C<sub>9</sub>F<sub>19</sub>-2e):**

Eluent used for the column chromatography was 20% EtOAc/Petroleum ether.

From 0.2 g of **9**, 0.2 g of LC<sub>23</sub>C<sub>9</sub>F<sub>19</sub> was obtained as a white solid (55 %).

**<sup>1</sup>H NMR (400 MHz, CDCl<sub>3</sub>):** 4.45-4.38 (m, 2H), 3.65-3.60 (m, 1H), 1.94-1.01 (m), 0.97 (d, J = 6.4 Hz, 3H), 0.92 (s, 3H), 0.64 (s, 3H).

**<sup>13</sup>C NMR (100 MHz, CDCl<sub>3</sub>)  $\delta$ :** 158.31 (t, J = 27 Hz), 71.84, 67.03, 56.47, 56.08, 42.79, 42.07, 40.41, 40.14, 36.44, 35.83, 35.32, 34.55, 34.07, 32.88, 30.53, 28.19, 27.15, 26.38, 24.11, 23.31, 20.78, 18.49, 11.79.

**<sup>19</sup>F NMR (376 MHz, CDCl<sub>3</sub>)  $\delta$ :** -81.67 (t, J = 9.8 Hz), -119.32 (t, J = 11.2 Hz), -122.54 (br), 122.67 (br), -123.5 (br), -126.99 (br s).

**HRMS:** Calcd. for  $C_{33}H_{39}O_3F_{19}$ : 867.2494; found 867.2504.

**IR (KBr,  $cm^{-1}$ ):** 3360, 2937, 2865, 1781, 1217 (C-F), 1152 (C-F).

**mp:** 80-81°C.

**$[\alpha]_D^{23}$ :** +19 (c 1.0,  $CHCl_3$ ).

**3 $\alpha$ , 12 $\alpha$ -Dihydroxy-24-nor-5 $\beta$ -cholan-23-yl perfluoroundecan-1-oate (DC<sub>23</sub>C<sub>10</sub>F<sub>21</sub>-2f):**

Eluent used for the column chromatography was 60% EtOAc/Petroleum ether.

From 0.3 g of **8**, 0.34 g of DC<sub>23</sub>C<sub>10</sub>F<sub>21</sub> was obtained as a white solid (60%).

**<sup>1</sup>H NMR (300 MHz,  $CDCl_3$ )  $\delta$ :** 4.46-4.42 (m, 2H), 3.98 (br s, 1H), 3.66-3.62 (m, 1H), 1.89-1.1 (m), 1.03 (d,  $J = 6.3$  Hz, 3H), 0.92 (s, 3H), 0.68 (s, 3H).

**<sup>13</sup>C NMR (100 MHz,  $CDCl_3$ )  $\delta$ :** 158.35 (t,  $J = 29$  Hz), 73.06, 71.67, 66.98, 48.19, 47.26, 46.52, 42.06, 36.39, 36.0, 35.23, 34.1, 34.03, 33.59, 32.76, 30.41, 28.72, 27.54, 27.11, 26.1, 23.59, 23.01, 17.39, 12.37.

**<sup>19</sup>F NMR (376 MHz,  $CDCl_3$ )  $\delta$ :** -81.69 (t,  $J = 9.0$  Hz), -119.34 (br s), -123.5 (br s), -123.58 (br s), 127.01 (br s).

**HRMS:** Calcd. for  $C_{34}H_{39}O_4F_{21}+Na$ : 933.2411; found : 933.2411.

**IR (KBr,  $cm^{-1}$ ):** 3439, 2935, 2862, 1779, 1213 (C-F), 1152 (C-F).

**mp:** 58-59°C.

**$[\alpha]_D^{23}$ :** +32 (c 1.0,  $CHCl_3$ ).

**3 $\alpha$ -Hydroxy-24-nor-5 $\beta$ -cholan-23-yl perfluoroundecan-1-oate (LC<sub>23</sub>C<sub>10</sub>F<sub>21</sub>-2g):**

Eluent used for the column chromatography was 20% EtOAc/Petroleum ether.

From 0.4 g of **9**, 0.44 g of LC<sub>23</sub>C<sub>10</sub>F<sub>21</sub> was obtained as a white solid (57 %).



**<sup>1</sup>H NMR (400 MHz, CDCl<sub>3</sub>):** δ 4.45-4.38 (m, 2H), 3.65-3.60 (m, 1H), 1.94-1.01 (m), 0.97 (d, J = 6.4 Hz, 3H), 0.92 (s, 3H), 0.64 (s, 3H).

**<sup>13</sup>C NMR (100 MHz, CDCl<sub>3</sub>) δ:** 158.38 (t, J = 27 Hz), 71.84, 67.02, 56.48, 56.09, 42.8, 42.08, 40.42, 40.15, 36.44, 35.83, 35.33, 34.55, 34.07, 32.88, 30.53, 28.19, 27.16, 26.38, 24.22, 24.11, 23.31, 20.78, 18.48, 11.78.

**<sup>19</sup>F NMR (376 MHz, CDCl<sub>3</sub>) δ:** -81.68 (t, J = 9.8 Hz), -119.32 (t, J = 11.2 Hz), -122.55 (br s), -123.51 (br s), -126.98 (br s).

**HRMS:** Calcd. for C<sub>34</sub>H<sub>39</sub>O<sub>3</sub>F<sub>21</sub>+Na: 917.2462; found 917.2459.

**IR (KBr, cm<sup>-1</sup>):** 3428, 2929, 2862, 1779, 1212 (C-F), 1152 (C-F).

**mp:** 87-88 °C.

**[α]<sub>D</sub><sup>23</sup>:** +7 (c 1.0, CHCl<sub>3</sub>).

**3α, 12α-Dihydroxy-24-nor-5β-cholan-23-yl perfluorododecan-1-oate (DC<sub>23</sub>C<sub>11</sub>F<sub>23</sub>-2i):**

Eluent used for the column chromatography was 60% EtOAc/Petroleum ether.

From 0.15 g of **8**, 0.16 g of DC<sub>23</sub>C<sub>10</sub>F<sub>21</sub> was obtained as a white solid (54%).

**<sup>1</sup>H NMR (400 MHz, CDCl<sub>3</sub>) δ:** 4.46-4.39 (m, 2H), 3.98 (br s, 1H), 3.65-3.59 (m, 1H), 1.93-1.25 (m), 1.03 (d, J = 6.4 Hz, 3H), 0.91 (s, 3H), 0.68 (s, 3H).

**<sup>13</sup>C NMR (100 MHz, CDCl<sub>3</sub>) δ:** 158.35 (t, J = 29.3 Hz), 73.05, 71.75, 66.96, 48.23, 47.31, 46.48, 42.0, 36.36, 35.98, 35.15, 34.07, 33.99, 33.61, 32.66, 30.40, 28.75, 27.49, 27.06, 26.07, 23.55, 23.06, 17.41, 12.43.

**<sup>19</sup>F NMR (376 MHz, CDCl<sub>3</sub>) δ:** -80.68 (t, J = 11.3 Hz), -118.39 (br s), -121.62 (br s), -122.55 (br s), -126.05 (br s).

**HRMS:** Calcd. for C<sub>35</sub>H<sub>39</sub>O<sub>4</sub>F<sub>23</sub>+Na: 983.2379; found : 983.2363.

**IR (KBr, cm<sup>-1</sup>):** 3403, 2939, 2868, 1780, 1219 (C-F), 1154 (C-F).

**mp:** 76-78°C.

$[\alpha]_D^{23}$ : +38(c 1.0, CHCl<sub>3</sub>).

**3 $\alpha$ -Hydroxy-24-nor-5 $\beta$ -cholan-23-yl perfluorododecan-1-oate (LC<sub>23</sub>C<sub>11</sub>F<sub>23</sub>-2j):**

Eluent used for the column chromatography was 20% EtOAc/Petroleum ether.

From 0.2 g of **9**, 0.22 g of LC<sub>23</sub>C<sub>11</sub>F<sub>23</sub> was obtained as a white solid (55 %).

**<sup>1</sup>H NMR (300 MHz, CDCl<sub>3</sub>)  $\delta$ :** 4.45-4.38 (m, 2H), 3.67-3.59 (m, 1H), 1.98-1.01 (m), 0.97 (d, J = 6.3 Hz), 0.92 (s, 3H), 0.64 (s, 3H).

**<sup>13</sup>C NMR (100 MHz, CDCl<sub>3</sub>)  $\delta$ :** 158.38 (t, J = 29 Hz), 71.84, 67.02, 56.46, 56.07, 42.78, 42.06, 40.41, 40.13, 36.41, 35.81, 35.31, 34.55, 34.06, 32.88, 30.52, 28.19, 27.14, 26.37, 24.11, 23.30, 20.77, 18.47, 11.78.

**<sup>19</sup>F NMR (376 MHz, CDCl<sub>3</sub>)  $\delta$ :** -80.70 (t, J = 9.5 Hz), -118.38 (br s), -121.7 (br s), -122.54 (br s), -126.03 (br s).

**HRMS:** Calcd. for C<sub>35</sub>H<sub>39</sub>O<sub>3</sub>F<sub>23</sub>+Na: 967.2430; found : 967.2435.

**IR (KBr, cm<sup>-1</sup>):** 3408, 2940, 2866, 1776, 1210 (C-F), 1153 (C-F).

**mp:** 100-101°C.

$[\alpha]_D^{23}$ : +12(c 1.0, CHCl<sub>3</sub>).

**3 $\alpha$ , 7 $\alpha$ , 12 $\alpha$ -Trihydroxy-24-nor-5 $\beta$ -cholan-23-yl perfluorotetradecan-1-oate (C<sub>23</sub>C<sub>13</sub>F<sub>27</sub>-2k):**

Eluent used for the column chromatography was EtOAc.

From 0.15 g of **7**, 0.13 g of C<sub>23</sub>C<sub>13</sub>F<sub>27</sub> was obtained as a white solid (41 %).

**<sup>1</sup>H NMR (400 MHz, CDCl<sub>3</sub>)  $\delta$ :** 4.46-4.40 (m, 2H), 3.99 (br s, 1H), 3.85 (br s, 1H), 3.49-3.44 (m, 1H), 1.96-1.25 (m), 1.04 (d, J = 6.0 Hz, 3H), 0.90 (s, 3H), 0.69 (s, 3H).

**<sup>13</sup>C NMR (100 MHz, CDCl<sub>3</sub>) δ:** 158.29 (t, J =27 Hz), 72.97, 71.8, 68.38, 66.94, 46.99, 46.35, 41.55, 41.31, 39.34, 35.16, 34.65, 34.57, 33.96, 32.69, 30.19, 28.07, 27.47, 26.24, 23.06, 22.26, 17.38, 12.09.

**<sup>19</sup>F NMR (376 MHz, CDCl<sub>3</sub>) δ:** -80.7 (t, J = 11.3 Hz), -118.37 (s), -121.65 (br s), -122.55 (br s), -126.02 (br s).

**HRMS:** Calcd. for C<sub>37</sub>H<sub>39</sub>O<sub>5</sub>F<sub>27</sub>+Na: 1099.2264; found : 1099.2261.

**IR (KBr, cm<sup>-1</sup>):** 3421, 2938, 2858, 1780, 1211 (C-F), 1150 (C-F).

**mp:** 78-79°C.

**[α]<sub>D</sub><sup>23</sup>:** +23 (c 1.0, CHCl<sub>3</sub>).

**3α, 12α-Dihydroxy-24-nor-5β-cholan-23-yl perfluorotetradecan-1-oate (DC<sub>23</sub>C<sub>13</sub>F<sub>27</sub>-2l):**

Eluent used for the column chromatography was 60% EtOAc/Petroleum ether.

From 0.3 g of **8**, 0.35 g of DC<sub>23</sub>C<sub>13</sub>F<sub>27</sub> was obtained as a white solid (53%).

**<sup>1</sup>H NMR (400 MHz, CDCl<sub>3</sub>) δ:** 4.45-4.41 (m, 2H), 3.98 (br s, 1H), 3.65-3.59 (m, 1H), 1.96-1.07 (m), 1.03 (d, J = 6.0 Hz, 3H), 0.91 (s, 3H), 0.68 (s, 3H).

**<sup>13</sup>C NMR (100 MHz, CDCl<sub>3</sub>) δ:** 158.36 (t, J = 27 Hz), 73.06, 71.79, 66.97, 48.27, 47.38, 46.53, 42.05, 36.43, 36.03, 35.18, 34.10, 34.04, 33.68, 32.66, 30.49, 28.83, 27.48, 27.08, 26.09, 23.56, 23.10, 17.47, 12.47.

**<sup>19</sup>F NMR (376 MHz, CDCl<sub>3</sub>) δ:** -81.68 (t, J = 9.8 Hz), -119.33 (s), -122.54 (br s), -123.54 (br s), -126.99 (br s).

**HRMS:** Calcd. for C<sub>37</sub>H<sub>39</sub>O<sub>4</sub>F<sub>27</sub>+Na: 1083.2315; found : 1083.2379.

**IR (KBr, cm<sup>-1</sup>):** 3428, 2932, 2866, 1780, 1212 (C-F), 1154 (C-F).

**mp:** 90-92°C.

**[α]<sub>D</sub><sup>23</sup>:** +20 (c 1.0, CHCl<sub>3</sub>).

**3 $\alpha$ -Hydroxy-24-nor-5 $\beta$ -cholan-23-yl perfluorotetradecan-1-oate (LC<sub>23</sub>C<sub>13</sub>F<sub>27</sub>-2m):**

Eluent used for the column chromatography was 20% EtOAc/Petroleum ether.

From 0.3 g of **9**, 0.34 g of LC<sub>23</sub>C<sub>13</sub>F<sub>27</sub> was obtained as a white solid (55 %).

**<sup>1</sup>H NMR (300 MHz, CDCl<sub>3</sub>)  $\delta$ :** 4.45-4.35 (m, 2H), 3.67-3.58 (m, 1H), 1.98-1.01 (m), 0.97 (d, J = 6.0 Hz), 0.92 (s, 3H), 0.64 (s, 3H).

**<sup>13</sup>C NMR (100 MHz, CDCl<sub>3</sub>)  $\delta$ :** 158.38 (t, J = 29 Hz), 71.84, 67.02, 56.47, 56.08, 42.79, 42.07, 40.41, 40.14, 36.43, 35.82, 35.32, 34.55, 34.07, 32.88, 30.53, 28.19, 27.15, 26.38, 24.11, 23.30, 20.78, 18.47, 11.78.

**<sup>19</sup>F NMR (376 MHz, CDCl<sub>3</sub>)  $\delta$ :** -80.68 (t, J = 7.5 Hz), -118.37 (s), -121.61 (br s), -122.57 (br s), -126.05 (br s).

**HRMS:** Calcd. for C<sub>37</sub>H<sub>39</sub>O<sub>3</sub>F<sub>27</sub>+Na: 1067.2366; found : 1067.2367.

**IR (KBr, cm<sup>-1</sup>):** 3323, 2936, 2865, 1778, 1210 (C-F), 1153 (C-F).

**mp:** 122-123°C.

**$[\alpha]_D^{23}$ :** +8 (c 1.0, CHCl<sub>3</sub>).

**Synthesis of non-fluorinated bile acid ester derivatives having spacer –O-(CO)-**

**3 $\alpha$ , 7 $\alpha$ , 12 $\alpha$ -Trihydroxy-24-nor-5 $\beta$ -cholan-23-yl decan-1-oate (C<sub>23</sub>C<sub>9</sub>H<sub>19</sub>-3a):**

Eluent used for column chromatography was 8% EtOH/ CHCl<sub>3</sub>.

From 0.26 g of **9**, 0.16 g of C<sub>23</sub>C<sub>9</sub>H<sub>19</sub> was obtained as a white sticky material (55%).

**<sup>1</sup>H NMR (400 MHz, CDCl<sub>3</sub>)  $\delta$ :** 4.17-4.03 (m, 2H), 3.96 (br s, 1H), 3.83 (br s, 1H), 3.45-3.40 (m, 1H), 2.28 (t, J = 7.6 Hz, 2 H), 2.2-2.17 (m, 2H), 1.92-1.26 (m), 1.01 (d, J = 6.4 Hz, 3H), 0.88 (s, 3H), 0.86 ( ), 0.68 (s, 3H).

**<sup>13</sup>C NMR (100 MHz, CDCl<sub>3</sub>)  $\delta$ :** 173.95, 72.94, 71.75, 68. 31, 62.52, 47.15, 46.35, 41.47, 41.42, 40.77, 39.39, 35.23, 34.70, 34.62, 34.51, 34.35, 33.02, 31.77, 30.29, 29.33, 29.19, 29.17, 29.06, 28.06, 27.59, 26.16, 24.93, 23.13, 22.56, 22.35, 17.64, 14.02, 12.29.

**HRMS:** Calcd. for  $C_{33}H_{58}O_5+Na$ : 557.4182; found : 557.4181.

**IR (KBr,  $cm^{-1}$ ):** 3400, 2929, 2858, 1735, 771.

**$[\alpha]_D^{23}$ :** +35 (c 1.0,  $CHCl_3$ ).

**3 $\alpha$ , 12 $\alpha$ -Dihydroxy-24-nor-5 $\beta$ -cholan-23-yl decan-1-oate (DC<sub>23</sub>C<sub>9</sub>H<sub>19</sub>-3b):**

Eluent used for column chromatography was 50 % EtOAc/ Petroleum ether.

From 0.2 g of **8**, 0.12 g of DC<sub>23</sub>C<sub>9</sub>H<sub>19</sub> was obtained as a white semi-solid material (57%).

**$^1H$  NMR (400 MHz,  $CDCl_3$ )  $\delta$ :** 4.17-4.03 (m, 2H), 3.98 (br s, 1H), 3.63-3.57 (m, 1H), 2.28 (t, J = 7.6 Hz, 2 H), 1.87-1.04 (m), 1.00 (d, J = 6.4 Hz, 3H), 0.90 (s, 3H), 0.88 (t, J = 6.8 Hz, 3 H), 0.68 (s, 3H).

**$^{13}C$  NMR (100 MHz,  $CDCl_3$ )  $\delta$ :** 173.94, 72.99, 71.60, 62.49, 48.13, 47.45, 46.46, 42.03, 36.35, 35.97, 35.20, 34.53, 34.39, 34.06, 33.53, 32.99, 31.80, 30.38, 29.62, 29.36, 29.22, 29.19, 28.58, 27.61, 27.10, 26.07, 24.96, 23.62, 23.06, 22.59, 17.63, 14.03, 12.56.

**HRMS:** Calcd. for  $C_{33}H_{58}O_4+Na$ : 541.4233; found : 541.4236.

**IR (KBr,  $cm^{-1}$ ):** 3378, 2928, 2860, 1736, 1042.

**$[\alpha]_D^{23}$ :** +39 (c 1.0,  $CHCl_3$ ).

**3 $\alpha$ -Hydroxy-24-nor-5 $\beta$ -cholan-23-yl decan-1-oate (LC<sub>23</sub>C<sub>9</sub>H<sub>19</sub>-3c):**

Eluent used for column chromatography was 15 % EtOAc/ Petroleum ether.

From 0.3 g of **9**, 0.14 g of LC<sub>23</sub>C<sub>9</sub>H<sub>19</sub> was obtained as a white semi-solid material (43%).

**$^1H$  NMR (400 MHz,  $CDCl_3$ )  $\delta$ :** 4.15-4.01 (m, 2H), 3.63-3.57 (m, 1H), 2.28 (t, J = 7.6 Hz, 2 H), 1.87-1.05 (m), 1.00 (d, J = 6.4 Hz, 3H), 0.90 (s, 3H), 0.88 (t, J = 6.8 Hz, 3H), 0.68 (s, 3H).

**<sup>13</sup>C NMR (100 MHz, CDCl<sub>3</sub>) δ:** 173.98, 71.72, 62.50, 56.43, 56.41, 42.7, 42.03, 40.36, 40.09, 36.31, 35.77, 35.30, 34.56, 34.50, 34.40, 33.13, 31.80, 30.41, 29.36, 29.22, 29.20, 29.09, 28.25, 27.13, 26.36, 24.97, 24.12, 23.30, 22.60, 20.74, 18.66, 14.04, 11.89.

**HRMS:** Calcd. for C<sub>33</sub>H<sub>58</sub>O<sub>3</sub>+Na: 525.4284; found : 525.4280.

**IR (KBr, cm<sup>-1</sup>):** 3444, 2928, 2858, 1737, 1465, 769.

**[α]<sub>D</sub><sup>23</sup>:** +34 (c 1.0, CHCl<sub>3</sub>)
